# Supplementary material for: Leishmania major Strain-Dependent Macrophage Activation Contributes to Pathogenicity in the Absence of Lymphocytes
Source: PubMed Central journal article supplement (PMC9603372; doi:10.1128/spectrum.01126-22), 2022-10-03
Supplement: spectrum.01126-22-s0001.pdf [file spectrum.01126-22-s0001.pdf]

## Supplementary data

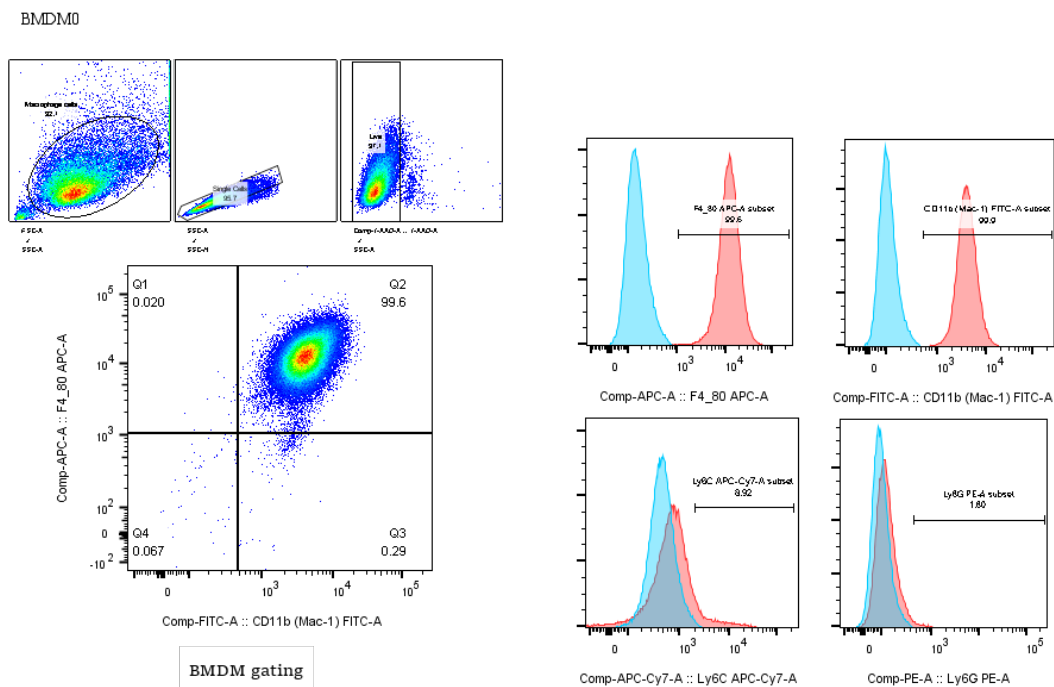

**Figure S1:** Bone marrow-derived macrophages phenotyping by flow cytometry. More than 96% of bone marrow-derived cells were identified as macrophages based on F4/80 and CD11b(Mac-1) expression after 7 days of culture

## RNA-seq Raw reads processing

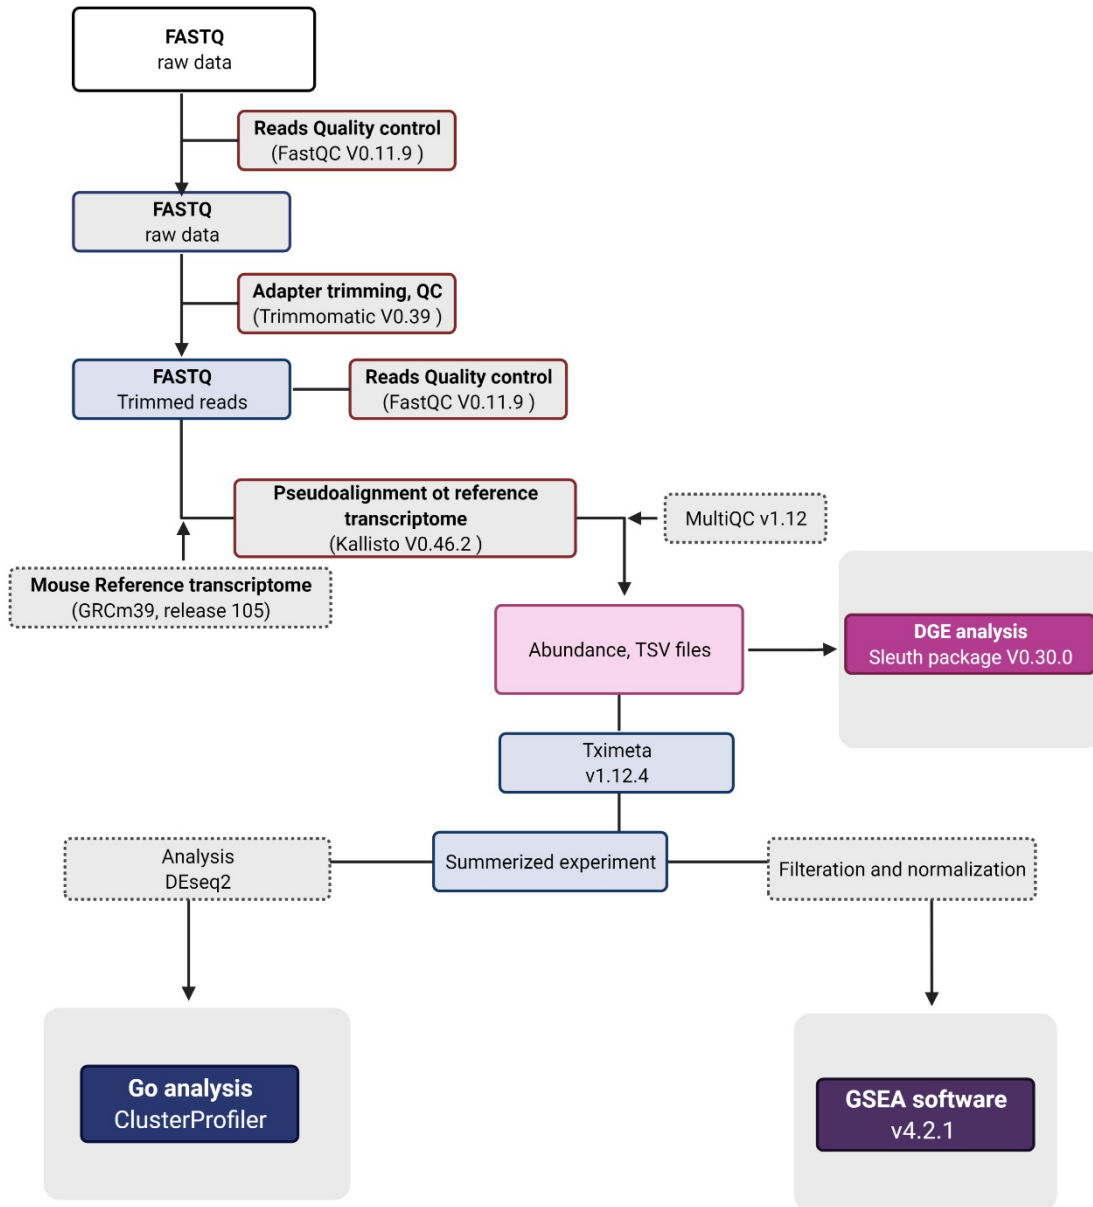

**Figure S2:** A flow chart showing the main RNA sequencing data processing steps Created by biorender.com.

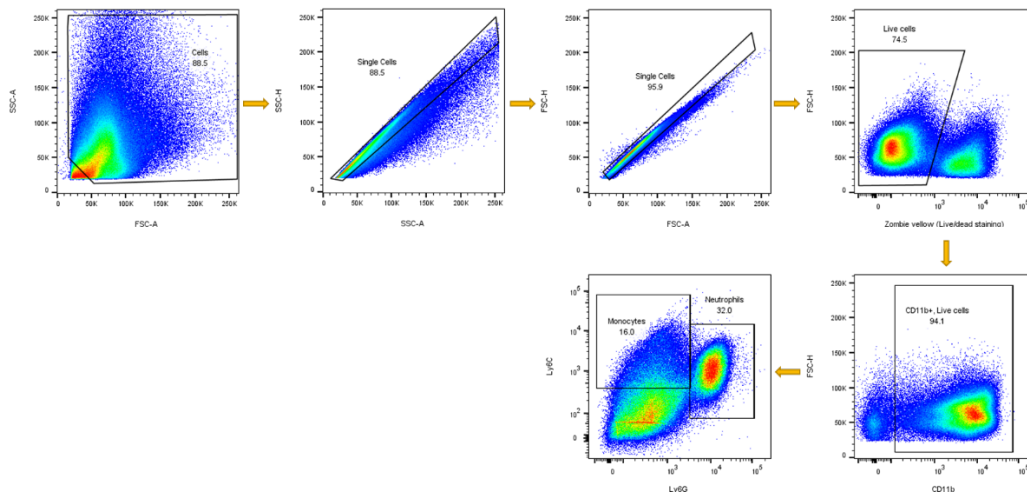

**Figure S3: Flow cytometric analysis of ear dermis cells (gating strategy).** C57BL/6 Rag2<sup>-/-</sup> mice were infected in the ear dermis with  $5 \times 10^4$  5-ASKH or FV9 metacyclic promastigotes, ear tissues were processed and phenotyped by Flow cytometry. After doublet and dead cells discrimination, we gated on CD11b<sup>+</sup> Cells which were defined as Ly6G<sup>high</sup> Ly6C<sup>int</sup> (neutrophils), Ly6G<sup>-</sup> Ly6C<sup>high</sup> (monocyte), Ly6G<sup>-</sup> Ly6C<sup>-</sup> (resident macrophages and DCs).

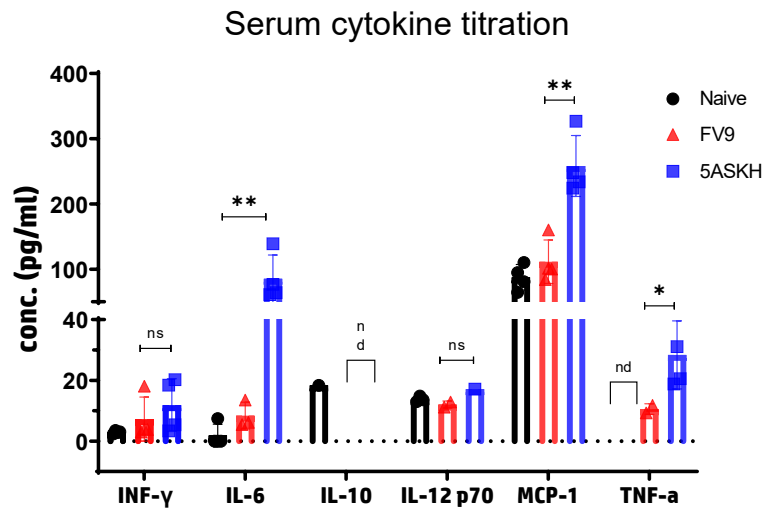

**Figure S4: Quantification of inflammatory cytokines in serum samples.** Rag2<sup>-/-</sup> mice were infected I.D. with  $5 \times 10^4$  5-ASKH or FV9, and serum was collected at 8-weeks post-infection. Each cytokine was measured by the BD cytometric beads array (CBA) mouse inflammatory cytokine kit. In addition, unpaired comparisons of 5ASKH vs FV9 infected mice was performed using student t-test (n = 4). The samples below the detection limit were excluded from the analysis.

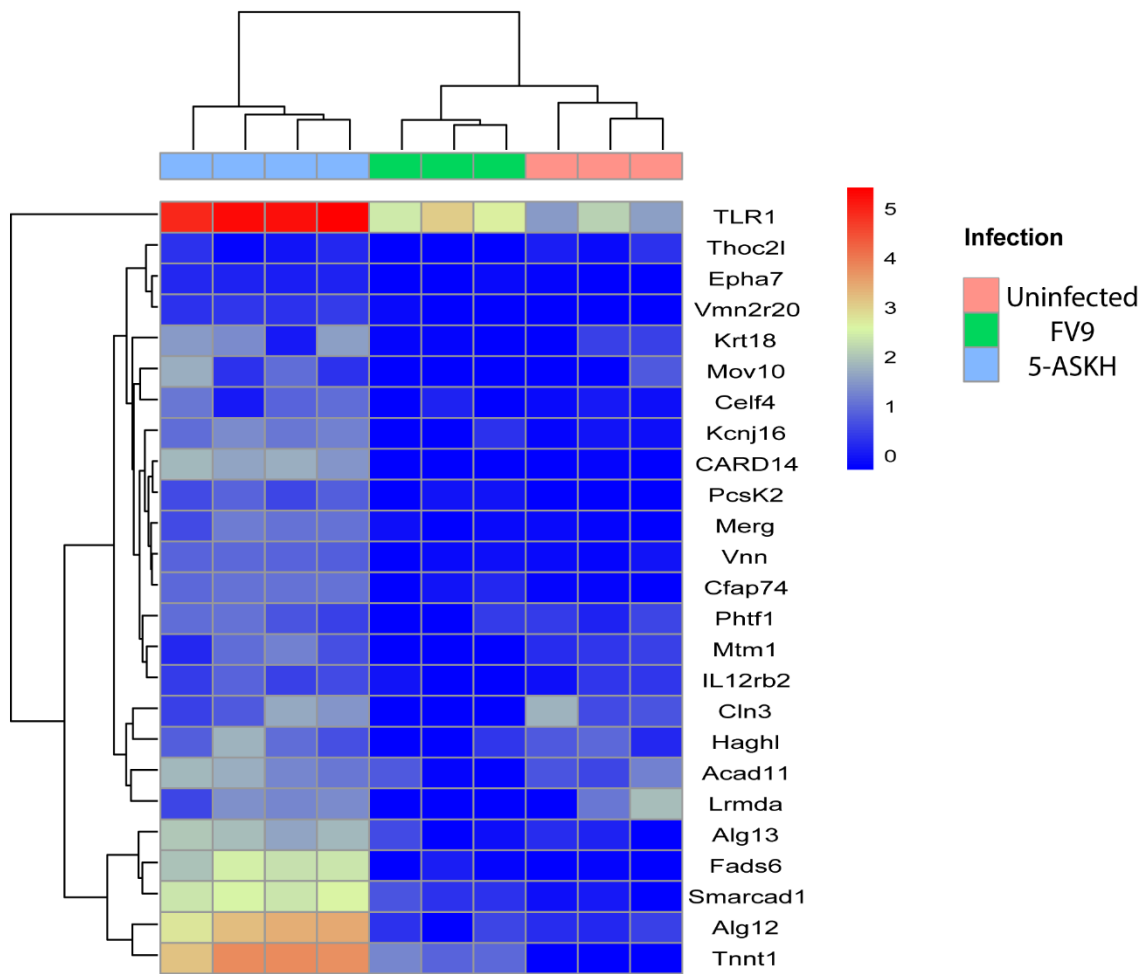

**Figure S5: Samples heatmap of the differentially expressed genes.** BMDM were cultured *in vitro* and infected for 5-days with 5-ASKH, FV9 (MOI; 10:1), or left untreated. The heatmap shows the top 25 differentially expressed genes  $\log_2 \text{FC} \geq 1.5$  and  $q\text{value} \leq 10e^{-5}$ .

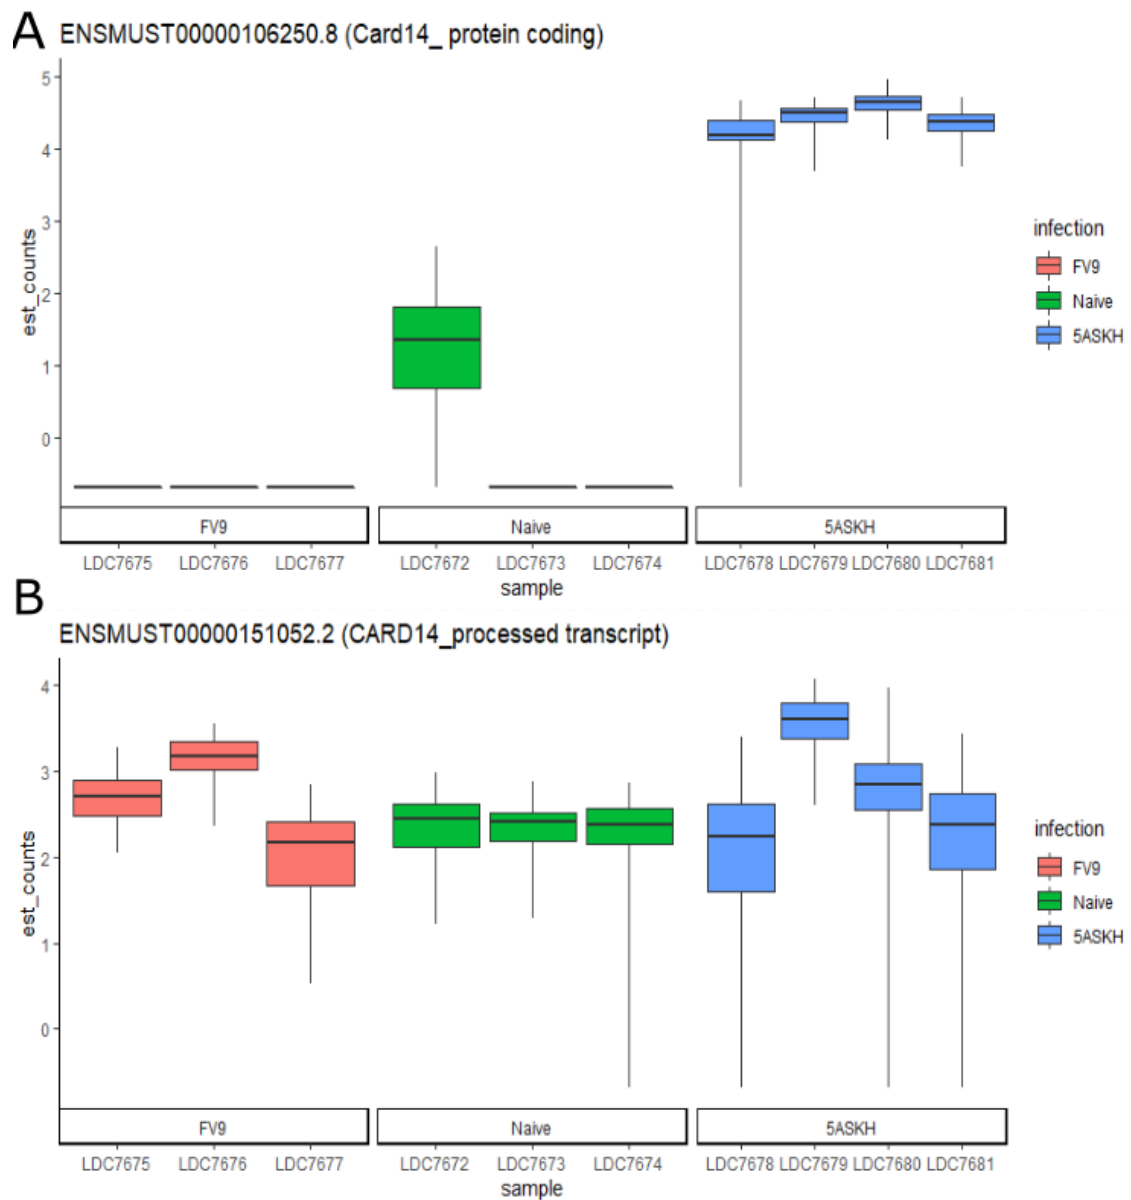

**Figure S6: bootstrap plotting of CARD14 transcript** generated by Sleuth R package. **(A)** boxplot of CARD14 protein-coding transcript that is upregulated in 5-ASKH, the bootstraps show that the differences are due to biological variations rather than technical variations. **(B)** The corresponding bootstraps of the unprocessed CARD14 transcript.

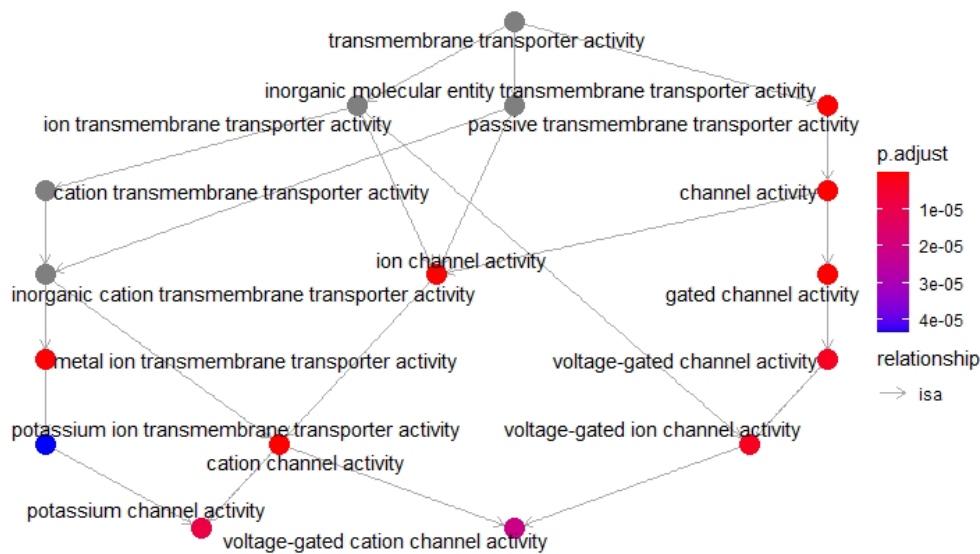

**Figure S7: GO enrichment network plot of FV9 vs uninfected showing the most significant GO terms with their correspondent adjusted P-value.** Differentially expressed genes in FV9-infected BMDMs compared with uninfected ones were extracted and analysed with ClusterProfiler.

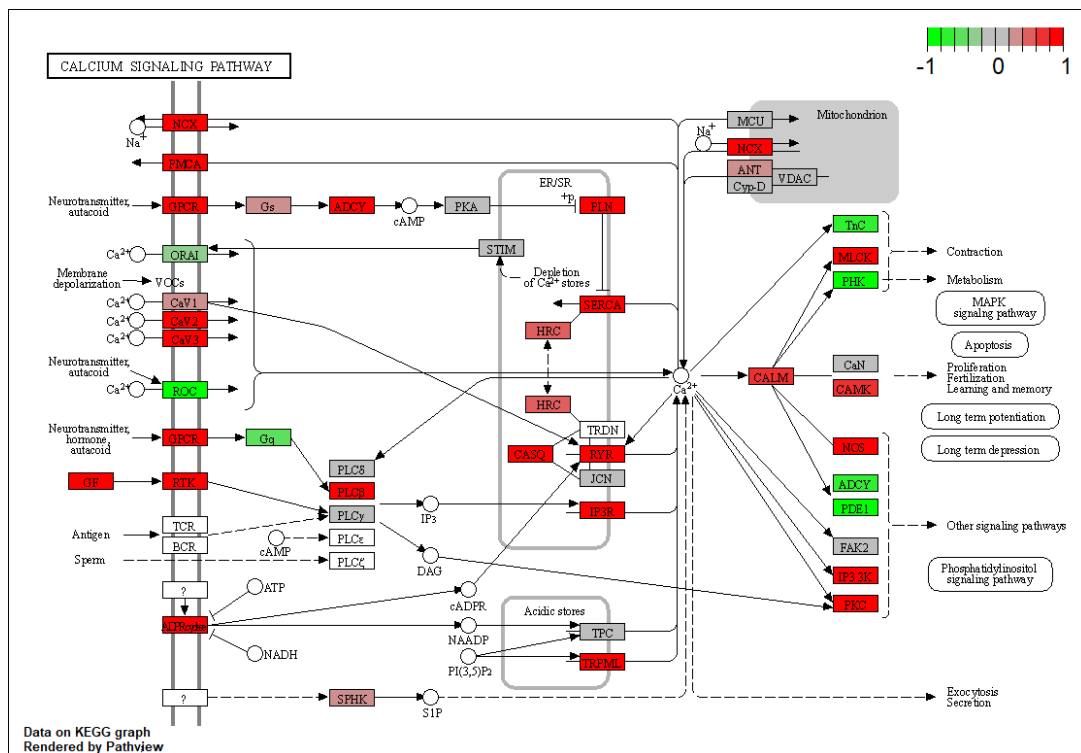

**Figure S8: Calcium signalling pathway from KEGG map.** Graphical representation showing DEGs in the Calcium signalling pathway leading to activation of PI3K-AKT or MAPK pathway induced by 5ASKH infection compared with uninfected BMDM. Upregulated genes are in Red, and downregulated are in green.

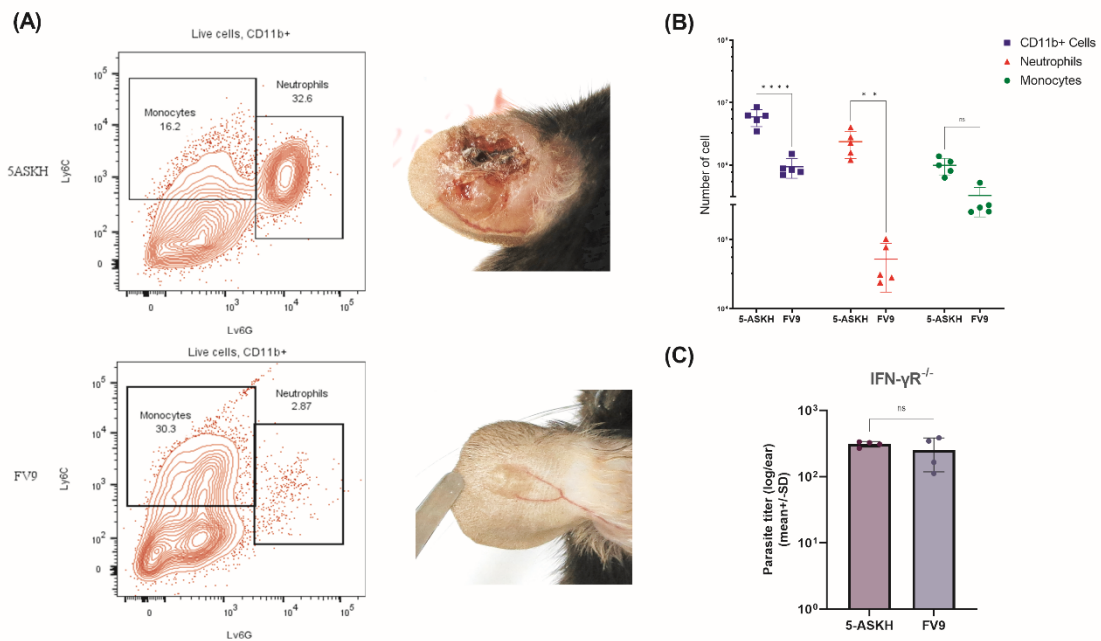

**Figure S9: FV9 infection into IFN- $\gamma$ R<sup>-/-</sup> mice induced less pathogenesis with fewer neutrophil accumulation than 5-ASKH at 4 weeks post-infection.**

Mice were intradermally IFN- $\gamma$ R<sup>-/-</sup> mice were infected with  $5 \times 10^4$  5-ASKH or FV9 metacyclic promastigotes. At 4 weeks post-infection, ear tissues were processed and phenotyped by flow cytometry. **(A)** Representative ear photos with the corresponding flow cytometric dot plots of ear-infiltrating CD11b<sup>+</sup> myeloid cells, grouped as Ly6G<sup>high</sup> Ly6C<sup>int</sup> (neutrophils), Ly6G<sup>-</sup> Ly6C<sup>high</sup> (monocyte). **(B)** The total number of cells recruited to the site of infection. **(C)** The corresponding parasite number in the infected ears.

**Table S1: List of Antibodies and reagents used for Flow Cytometry.**

| <b>Table S1: Reagent used for flow cytometric analysis</b> |              |                         |                     |                        |
|------------------------------------------------------------|--------------|-------------------------|---------------------|------------------------|
| <b>Antibody</b>                                            | <b>Clone</b> | <b>Catalogue Number</b> | <b>Manufacturer</b> | <b>Dilution Factor</b> |
| <b>Zombie Yellow™ Fixable Viability Kit</b>                |              | 423104                  | Biolegend™          | 1/500 in PBS           |
| <b>Zombie Aqua™ Fixable Viability Kit</b>                  |              | 423101                  | Biolegend™          | 1/500 in PBS           |
| <b>7-Amino-Actinomycin D (7-AAD)</b>                       |              | 559925                  | BD Pharmingen™      | 5 µL/test              |
| <b>TruStain FcX (anti-mouse CD16/32)</b>                   | 93           | 101320                  | Biolegend™          | 1/500                  |
| <b>APC/Cyanine7 anti-mouse CD45 Antibody</b>               | 30-F11       | 103116                  | Biolegend™          | 1/400                  |
| <b>APC/Cyanine7 anti-mouse/human CD11b Antibody</b>        | M1/70        | 101226                  | Biolegend™          | 1/400                  |
| <b>FITC anti-mouse/human CD11b Antibody</b>                | M1/70        | 101206                  | Biolegend™          | 1/400                  |
| <b>PerCP-Cyanine5.5 CD11b Antibody</b>                     | M1/70        | 45-0112-80              | ebioscience™        | 1/400                  |
| <b>APC anti-mouse Ly-6G Antibody</b>                       | 1A8          | 127613                  | Biolegend™          | 1/300                  |
| <b>Biotin anti-mouse Ly-6G Antibody</b>                    | 1A8          | 127603                  | Biolegend™          | 1/300                  |
| <b>Biotin anti-mouse Ly-6C Antibody</b>                    | HK1.4        | 128003                  | Biolegend™          | 1/200                  |
| <b>Ly-6C Monoclonal Antibody, Alexa Fluor 488</b>          | HK1.4        | 53-5932-82              | ebioscience™        | 1/200                  |
| <b>BV421 Rat Anti-Mouse CD49d</b>                          | 9C10         | 740016                  | BD OptiBuild™       | 1/400                  |
| <b>PE anti-mouse CD284 (TLR4) Antibody</b>                 | SA15-21      | 145403                  | Biolegend™          | 1/400                  |
| <b>CD62L (L-Selectin) FITC,</b>                            | MEL-14       | 11-0621-82              | ebioscience™        | 1/300                  |
| <b>APC anti-mouse F4/80 Antibody</b>                       | BM8          | 123116                  | Biolegend™          | 1/200                  |
| <b>Brilliant Violet 421™ anti-mouse F4/80 Antibody</b>     | BM8          | 123137                  | Biolegend™          | 1/200                  |
| <b>PE anti-mouse CD206 (MMR) Antibody</b>                  | C068C2       | 141706                  | Biolegend™          | 1/300                  |
| <b>APC anti-mouse CD206 (MMR) Antibody</b>                 | C068C2       | 141708                  | Biolegend™          | 1/300                  |
| <b>MHC Class II (I-A/I-E) Monoclonal Antibody, PE</b>      | M5/114.15.2  | 12-5321-82              | ebioscience™        | 1/400                  |
| <b>APC Anti-Mouse MHC Class II (I-A/I-E)</b>               | M5/114.15.2  | 20-5321                 | TONBO bioscience™   | 1/400                  |
| <b>PerCP-Cyanine5.5 Anti-Mouse MHC Class II (I-A/I-E)</b>  | M5/114.15.2  | 65-5321                 | TONBO bioscience™   | 1/300                  |
| <b>APC anti-mouse CD38 Antibody</b>                        | 90           | 102712                  | Biolegend™          | 1/400                  |
| <b>BV786 Hamster Anti-Mouse CD69</b>                       | H1.2F3       | 564683                  | BD Horizon™         | 1/400                  |
| <b>PerCP/Cyanine5.5 Streptavidin</b>                       |              | 405214                  | Biolegend™          | 1/400                  |
| <b>Brilliant Stain Buffer</b>                              |              | 563794                  | BD Horizon™         | 50 uL/test             |
| <b>APC Mouse IgG1, κ Isotype Ctrl (FC) Antibody</b>        | MOPC-21      | 400121                  | Biolegend™          | 1/300                  |
| <b>PE Mouse IgG2b, κ Isotype Ctrl Antibody</b>             | MG2b-57      | 401207                  | Biolegend™          | 1/300                  |
| <b>CellCover</b>                                           |              | 800-125                 | ANACYTE™            |                        |
